# Supplementary material
Source: Springer Nature journal article supplement (https://www.springermedizin.de/resource/supplementary/13058_2012_3162_MOESM4_ESM.pdf/9703394)
Supplement: MOESM4 [file 9703394]

**Table 3: Performance of Manchester Scoring method either (a) unadjusted, (b) adjusted for ER status, or (c) adjusted for ER status and PTEN status.**

| Manchester Scoring Method                    | Cohort, n | Total BRCA1 Carriers, n | No Pathology Adjustment |                          | With Pathology Adjustment |                          |
|----------------------------------------------|-----------|-------------------------|-------------------------|--------------------------|---------------------------|--------------------------|
|                                              |           |                         | Individuals tested, n   | BRCA1 carriers tested, n | Individuals tested, n     | BRCA1 carriers tested, n |
| Adjustment + Estrogen receptor status        | 345       | 28                      | 72                      | 12                       | 82                        | 18                       |
| Adjustment + Estrogen receptor + PTEN status | 26        | 7                       | 5                       | 3                        | 10                        | 6                        |

Table 3 shows the predicted and observed number of BRCA1 and BRCA2 (combined) carriers in patients with low (1-14) and high Manchester score, either without adjustment for pathological features, or adjustment for ER status and other features [14-16], or further adjustment including +1 for loss of PTEN.
